# Supplementary material
Source: MDPI journal article supplement (https://www.mdpi.com/2073-4344/11/5/583)
Supplement: s1 [file s1]

# Facile Redox Synthesis of Novel Bimetallic Cr<sup>n+</sup>/Pd<sup>0</sup> Nanoparticles Supported on SiO<sub>2</sub> and TiO<sub>2</sub> for Catalytic Selective Hydrogenation with Molecular Hydrogen

Olga A. Kirichenko <sup>1,2,\*</sup>, Elena A. Redina <sup>1,\*</sup>, Gennady I. Kapustin <sup>1</sup>, Marina S. Chernova <sup>1</sup>, Anastasiya A. Shesterkina <sup>1,3</sup> and Leonid M. Kustov <sup>1,4</sup>

<sup>1</sup> N.D. Zelinsky Institute of Organic Chemistry, Russian Academy of Sciences, 47 Leninsky prospect, Moscow, 119991, Russian Federation; gik@ioc.ac.ru (G.I.K.); marina.chernova.1998@inbox.ru (M.S.C.); anastasiia.strelkova@mail.ru (A.A.S.); lmk@ioc.ac.ru (L.M.K.)

<sup>2</sup> M.V. Lomonosov Institute of Fine Chemical Technologies, Russian Technological University MIREA, 86 Vernadsky prospect, 119571, Moscow, Russian Federation

<sup>3</sup> National University of Science and Technology (MISIS), Nanochemistry and ecology department, 2 Leninsky prospect, 119991, Moscow, Russian Federation

<sup>4</sup> Chemistry Department, Moscow State University, Leninskie Gory 1, bldg. 3, 119992, Moscow, Russian Federation

\* Correspondence: okiriche@hotmail.com\_or okiriche@ioc.ac.ru (O.A.K.); redinaea@ioc.ac.ru (E.A.R.)

**Table S1. Elemental analysis of the samples obtained by SEM-EDS**

| <b>Sample</b>    | <b>Pd/T</b>          | <b>Cr/Pd/T-CoR</b>          | <b>Cr/Pd/T-RC</b>           | <b>Cr/Pd/T-RC-3</b>        |
|------------------|----------------------|-----------------------------|-----------------------------|----------------------------|
| Composition      | 1Pd/TiO <sub>2</sub> | 0,36Cr/1Pd/TiO <sub>2</sub> | 0,36Cr/1Pd/TiO <sub>2</sub> | 1,1Cr/1Pd/TiO <sub>2</sub> |
| <b>Pd. % wt.</b> | 0.8                  | 1.6                         | 0.9                         | 1.0                        |
|                  | 1.0                  | 0.9                         | 1.0                         | 0.9                        |
|                  | 0.8                  | 1.2                         | 0.9                         | 0.9                        |
| <b>Average</b>   | <b>0.9</b>           | <b>1.2</b>                  | <b>0.9</b>                  | <b>0.9</b>                 |
| <b>Cr. % wt.</b> | –                    | 0.4                         | 0.3                         | 1.2                        |
|                  |                      | 0.3                         | 0.4                         | 1.1                        |
|                  |                      | 0.6                         | 0.2                         | 1.1                        |
| <b>Average</b>   |                      | <b>0.4</b>                  | <b>0.3</b>                  | <b>1.1</b>                 |
| <b>Ti. % wt.</b> | 60.9                 | 56.8                        | 54.4                        | 56.2                       |
|                  | 56.9                 | 58.0                        | 52.4                        | 53.5                       |
|                  | 54.1                 | 51.4                        | 51.9                        | 55.1                       |
| <b>Average</b>   | <b>57.3</b>          | <b>55.4</b>                 | <b>52.9</b>                 | <b>54.9</b>                |
| <b>O. % wt.</b>  | 31.2                 | 34.0                        | 33.7                        | 33.0                       |
|                  | 35.0                 | 33.5                        | 35.3                        | 35.9                       |
|                  | 37.6                 | 31.7                        | 37.0                        | 34.1                       |
| <b>Average</b>   | <b>34.6</b>          | <b>33.1</b>                 | <b>35.3</b>                 | <b>34.3</b>                |

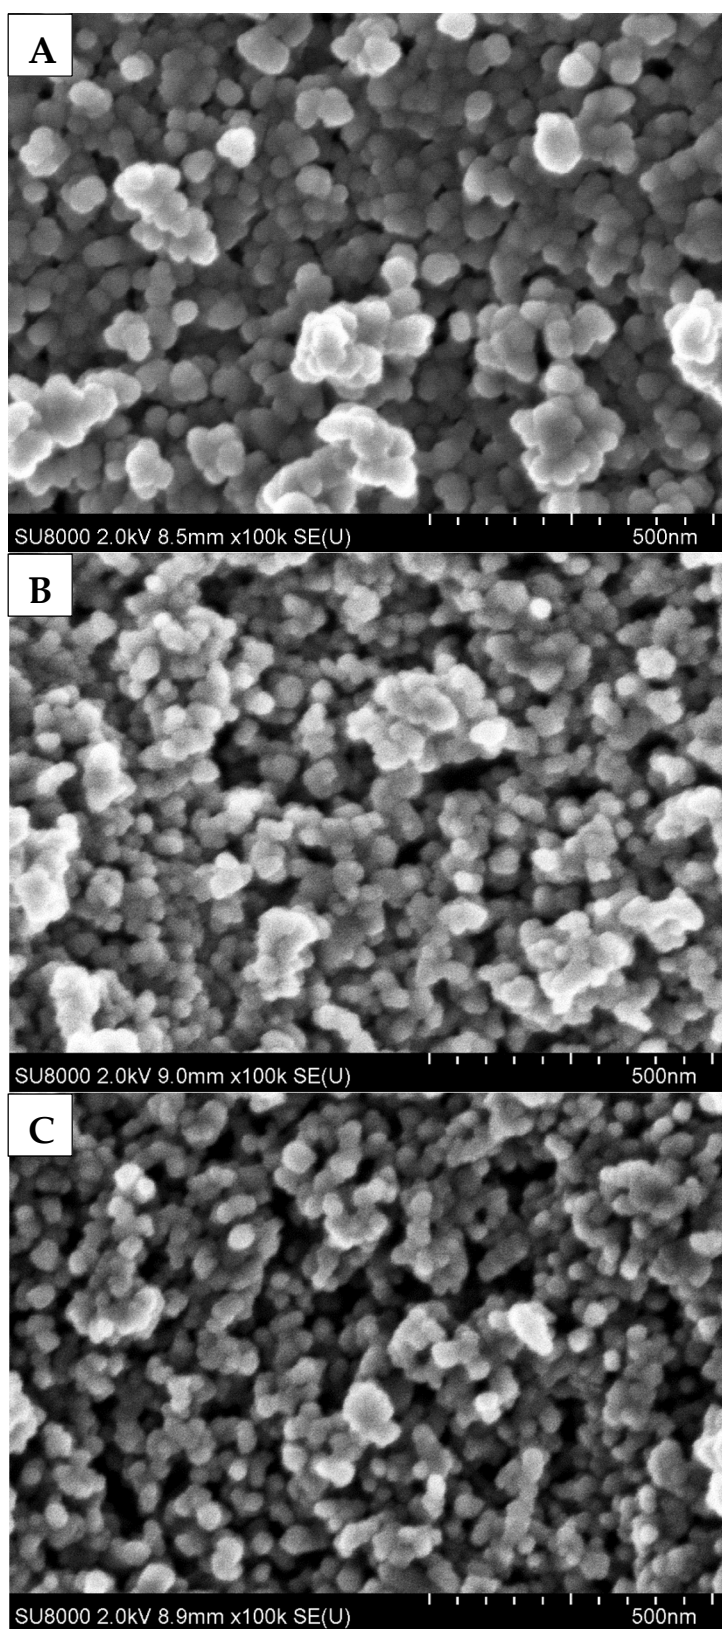

**Figure S1.** SEM images of the samples: (a) Cr/Pd/T-CoR; (b) Cr/Pd/T-RC; (c) Cr/Pd/T-RC-3.

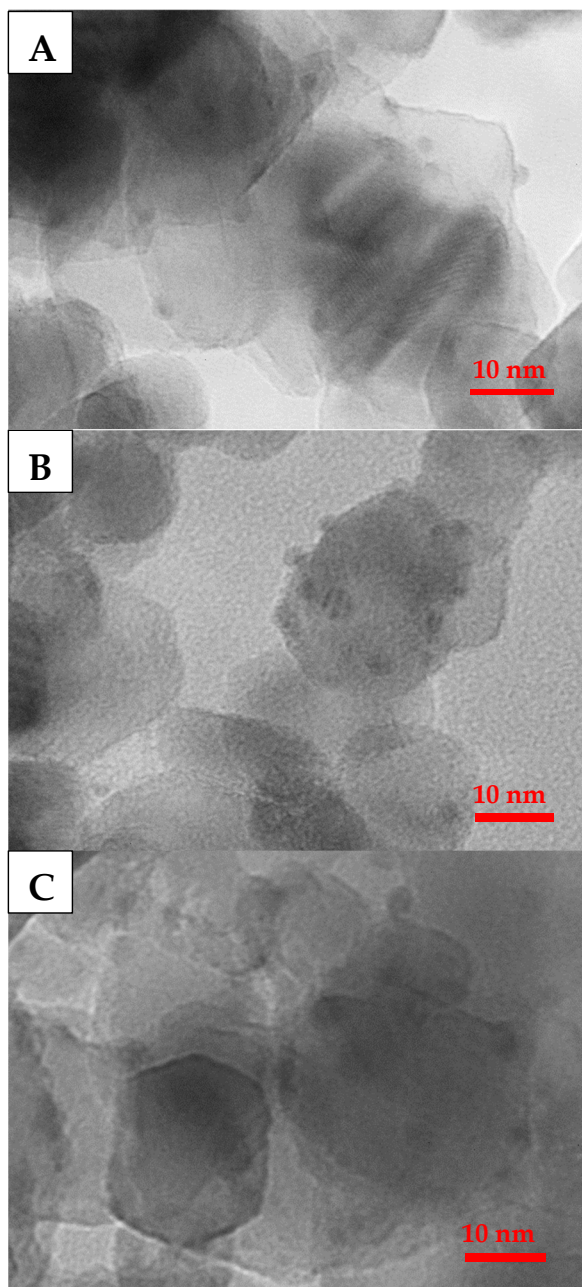

**Figure S2.** TEM images and particle size distribution of the samples: (a) Cr/Pd/T-CoR; (b) Cr/Pd/T-RC; (c) Cr/Pd/T-RC-3
